# Supplementary material for: Nanopore DNA Sequencing and Genome Assembly on the International Space Station
Source: PubMed Central journal article supplement (PMC5740133; doi:10.1038/s41598-017-18364-0), 2017-12-21
Supplement: 41598_2017_18364_MOESM1_ESM.pdf [file 41598_2017_18364_MOESM1_ESM.pdf]

## **Nanopore DNA Sequencing and Genome Assembly on the International Space Station**

Sarah L. Castro-Wallace<sup>1</sup>, Charles Y. Chiu<sup>2,3</sup>, Kristen K. John<sup>4</sup>, Sarah E. Stahl<sup>5</sup>, Kathleen H. Rubins<sup>6</sup>, Alexa B.R. McIntyre<sup>7</sup>, Jason P. Dworkin<sup>8</sup>, Mark L. Lupisella<sup>9</sup>, David J. Smith<sup>10</sup>, Douglas J. Botkin<sup>11</sup>, Timothy A. Stephenson<sup>12</sup>, Sissel Juul<sup>13</sup>, Daniel J. Turner<sup>13</sup>, Fernando Izquierdo<sup>13</sup>, Scot Federman<sup>2,3</sup>, Doug Stryke<sup>2,3</sup>, Sneha Somasekar<sup>2,3</sup>, Noah Alexander<sup>7</sup>, Guixia Yu<sup>2,3</sup>, Christopher E. Mason<sup>7,14,15</sup>, and Aaron S. Burton<sup>16\*</sup>

### **Supplementary Information**

**Supplementary Table 1. Comparison of flight and ground sequencing run statistics**

| Run (Experimenter)         | Date                 | Sample ID | Library input (ng) | Run duration (hours) | Pre-flight pores from platform QC | Total active pores after sample loading (distribution) | Total raw reads |               |
|----------------------------|----------------------|-----------|--------------------|----------------------|-----------------------------------|--------------------------------------------------------|-----------------|---------------|
| G1 (Stahl)                 | August 26th, 2016    | 1         | 102                | 6                    | 1,375                             | 640 (365, 193, 68, 14)                                 | 14,932          |               |
| G2 (Stahl)                 | September 3rd, 2016  | 1         | 102                | 6                    | 1,121                             | 188 (188, 25, 2, 0)                                    | 778             |               |
| G3 (Stahl)                 | September 7th, 2016  | 1         | 102                | 6                    | 1,089                             | 742 (404, 232, 87, 19)                                 | 16,846          |               |
| G4 (Burton)                | September 13th, 2016 | 4         | 99                 | 48                   | 1,548                             | 1432 (506, 445, 331, 150)                              | 18,836          |               |
| G5 (Stahl)                 | October 18th, 2016   | 2         | 96                 | 48                   | 1,137                             | 363 (279, 73, 11, 0)                                   | 15,265          |               |
| G6 (injection 1; Stahl)    | October 25th, 2016   | 3         | 105                | 6                    | 1,409                             | 361 (253, 90, 17, 1)                                   | 4,981           |               |
| G6 (injection 2; Stahl)    | October 26th, 2016   | 3         | 105                | 48                   | 1,409 <sup>a</sup>                | 172 (132, 39, 1, 0) <sup>b</sup>                       | 616             |               |
| G7 (Stahl)                 | November 26th, 2016  | 2         | 96                 | 18 <sup>c</sup>      | 1,039                             | 796 (429, 248, 87, 22)                                 | 43,047          |               |
| G8 (Stahl)                 | January 9th, 2017    | 2         | 96                 | 48                   | 991                               | 717 (382, 233, 81, 21)                                 | 15,252          |               |
|                            |                      |           |                    |                      | <b>Average</b>                    | <b>1,214</b>                                           | <b>655</b>      | <b>14,506</b> |
|                            |                      |           |                    |                      |                                   |                                                        | Total reads     | 130,553       |
| ISS1 (Rubins)              | August 26th, 2016    | 1         | 102                | 6                    | 969                               | 727 (394, 231, 87, 15)                                 | 14,903          |               |
| ISS2 (Rubins)              | September 3rd, 2016  | 1         | 102                | 6                    | 1,148                             | 1014 (439, 322, 199, 54)                               | 16,931          |               |
| ISS3 (Rubins)              | September 7th, 2016  | 1         | 102                | 6                    | 1,313                             | 1066 (456, 364, 189, 57)                               | 17,715          |               |
| ISS4 (Rubins)              | September 13th, 2016 | 4         | 99                 | 48                   | 1,081                             | 880 (408, 289, 144, 41)                                | 40,144          |               |
| ISS5 (Rubins)              | October 18th, 2016   | 2         | 96                 | 48                   | 897                               | 702 (376, 214, 97, 15)                                 | 60,864          |               |
| ISS6 (injection 1; Rubins) | October 25th, 2016   | 3         | 105                | 6                    | 1,067                             | 886 (443, 284, 122, 37)                                | 18,604          |               |
| ISS6 (injection 2; Rubins) | October 26th, 2016   | 3         | 105                | 48                   | 1,067 <sup>a</sup>                | 699 (384, 206, 86, 23) <sup>b</sup>                    | 41,973          |               |
| ISS7 (Whitson)             | November 26th, 2016  | 2         | 96                 | 42 <sup>c</sup>      | 1,055                             | 951 (452, 318, 146, 35)                                | 39,154          |               |
| ISS8 (Whitson)             | January 9th 2017     | 2         | 96                 | 48                   | 1,220                             | 924 (422,297,159,46)                                   | 34,026          |               |
|                            |                      |           |                    |                      | <b>Average</b>                    | <b>1,094</b>                                           | <b>894</b>      | <b>31,590</b> |
|                            |                      |           |                    |                      |                                   |                                                        | Total reads     | 284,314       |

<sup>a</sup>The same flow cell was used for 6.1 and 6.2 so the platform QC numbers are the same.

<sup>b</sup>The number of active pores from 6.2 was not included in the average number of pores across all flow cells.

<sup>c</sup>Denotes sequencing runs that terminated early due to the Surface Pro 3 running out of power.

**Supplementary Table 2. Statistics for mouse, *E. coli*, and lambda phage reads identified using GraphMap**

|                |              | # reads | average % pairwise identity | mean length (bp) | range of lengths (bp) |
|----------------|--------------|---------|-----------------------------|------------------|-----------------------|
| mouse          | ISS Flight 1 | 5,941   | 82.90%                      | 6,018            | [153 - 41,291]        |
|                | ISS Flight 2 | 5,809   | 84.60%                      | 6,259            | [153 - 30,149]        |
|                | ISS Flight 3 | 7,111   | 84.90%                      | 6,248            | [224 - 37,378]        |
|                | ISS Flight 4 | 11,061  | 79.00%                      | 6,135            | [224 - 28,178]        |
|                | ISS Flight 5 | 16,478  | 79.40%                      | 7,210            | [94 - 47,821]         |
|                | ISS Flight 6 | 14,497  | 80.50%                      | 6,969            | ]152 - 46,537]        |
|                | ISS Flight 7 | 10,486  | 83.00%                      | 7,379            | [80 - 55,294]         |
|                | ISS Flight 8 | 9,151   | 83.70%                      | 7,917            | [106 - 47,754]        |
|                | TOTAL        | 80,534  | 81.6% [+/- 7.7%]            | 6,880            | [80 - 55,294]         |
| <i>E. coli</i> | ISS Flight 1 | 1,884   | 84.20%                      | 6,015            | [343 - 39,907]        |
|                | ISS Flight 2 | 1,864   | 86.00%                      | 6,419            | [181 - 48,086]        |
|                | ISS Flight 3 | 2,312   | 85.90%                      | 6,341            | [209 - 31,226]        |
|                | ISS Flight 4 | 11,077  | 81.40%                      | 4,348            | [160 - 51,783]        |
|                | ISS Flight 5 | 19,553  | 81.20%                      | 5,981            | [190 - 72,619]        |
|                | ISS Flight 6 | 21,546  | 82.00%                      | 5,450            | [152 - 64,359]        |
|                | ISS Flight 7 | 12,611  | 84.40%                      | 6,083            | [177 - 53,327]        |
|                | ISS Flight 8 | 10,425  | 85.30%                      | 6,474            | [125 - 57,043]        |
|                | TOTAL        | 81,272  | 82.8% [+/- 7.4%]            | 5,718            | [125 - 72,619]        |
| lambda phage   | ISS Flight 1 | 5,497   | 84.30%                      | 5,961            | [165 - 29,732]        |
|                | ISS Flight 2 | 5,404   | 86.50%                      | 6,304            | [188 - 39,327]        |
|                | ISS Flight 3 | 6,575   | 86.50%                      | 6,202            | [157 - 32,341]        |
|                | ISS Flight 4 | 11,007  | 81.60%                      | 5,951            | [133 - 28,442]        |
|                | ISS Flight 5 | 19,718  | 82.60%                      | 6,291            | [153 - 39,871]        |
|                | ISS Flight 6 | 19,168  | 83.50%                      | 6,230            | [149 - 38,605]        |
|                | ISS Flight 7 | 12,368  | 85.60%                      | 6,358            | [133 - 31,445]        |
|                | ISS Flight 8 | 10,729  | 86.00%                      | 6,502            | [133 - 39,190]        |
|                | TOTAL        | 90,466  | 84.1% [+/- 7.2%]            | 6,245            | [133 - 39,871]        |

## Supplementary Figures and Legends

### Supplementary Figure 1. Metrichor/Epi2me analysis of Earth and MinION reads 1 – 4.

Oxford Nanopore Technologies created a custom chained workflow consisting of 1D basecalling of the raw fast5 files, then 2D basecalling, extraction of quality score and read-length information, and finally read alignment. The workflow is capable of processing individual reads as soon as they are generated on the MinION, meaning that data can be analysed in almost real-time. Due to internet limitations on the ISS, data was downloaded and processed immediately on Earth following completion of each run. In this way, basecalling and alignment of the data were performed almost simultaneously, allowing the success of the experiment to be confirmed very shortly after the workflow was started. For alignment, the workflow first takes 2D reads and uses Minimap <sup>1</sup> to establish whether each read maps to the mouse BALB/C, *E. coli* K-12 or lambda phage genomes. When reads are found to align to both lambda and *E. coli* genomes, the workflow uses BLAST <sup>2</sup> to identify the correct placement. Any reads that still cannot be resolved in this way are placed into the 'unknown' group. Reads that do not align to any of the three reference genomes are placed into the no\_match group (Supplementary Figures 1a and 1b). Supplementary Figure 1c shows read counts for two Earth and all four ISS runs together; data for G2 were not included.

a) First of four datasets generated on Earth as ground controls

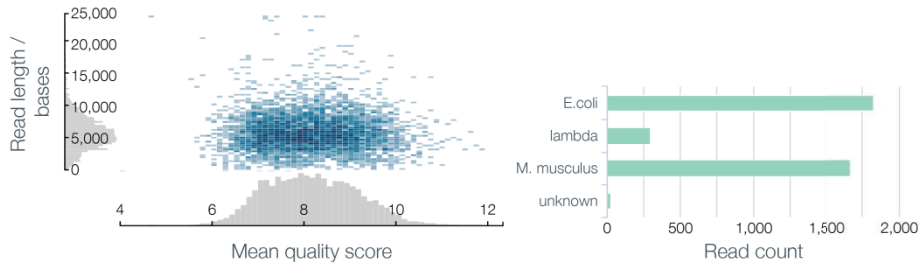

b) First of four datasets generated on ISS

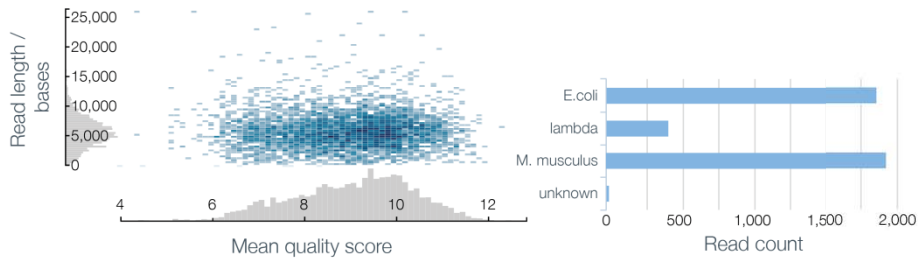

c) Percentage of reads mapping to each reference genome for Earth and ISS runs

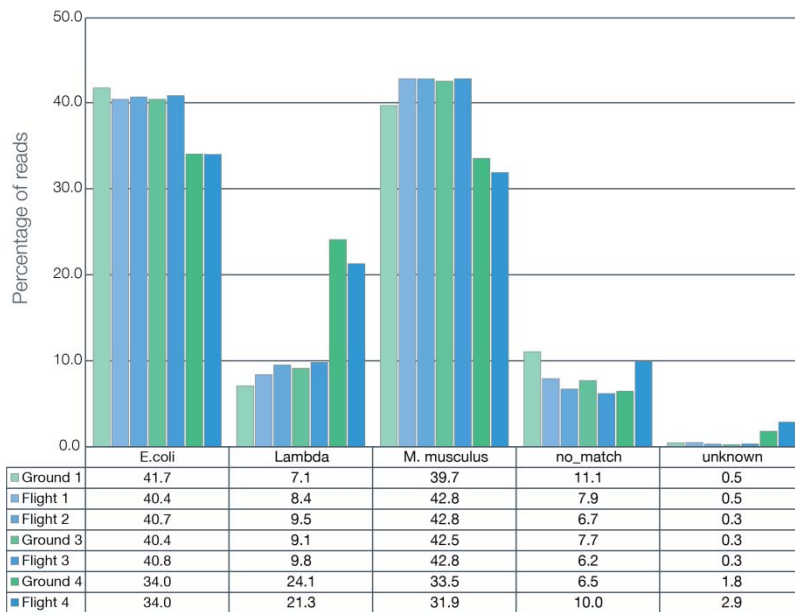

**Supplementary Figure 2. Quality metrics of runs 1 – 4.** The number of stays per base (i.e., the number of detected changes in the amperage that do not correspond to new k-mers, above) and number of skips per base (i.e., the number of new k-mers in a basecalled sequence that do not correspond to the detected changes in amperage, below) for the four runs on the ISS and time-matched controls on the ground. The distributions were significantly different in all cases using the Kolmogorov-Smirnov test, but by so little where both runs were successful that there is likely no difference in signal inherent to data generated on the ISS vs. on the ground that would affect basecalling.

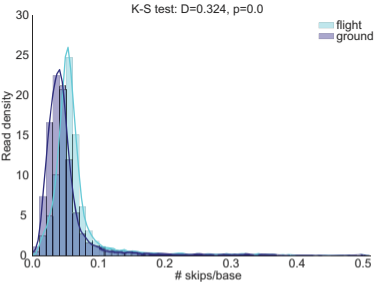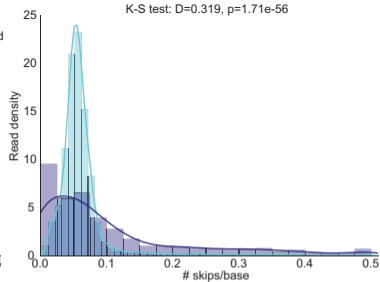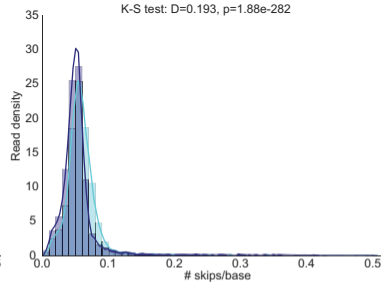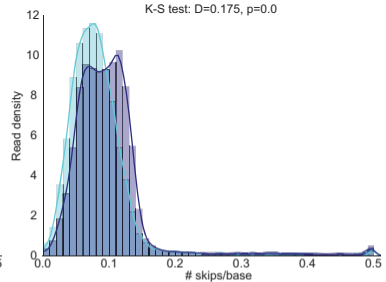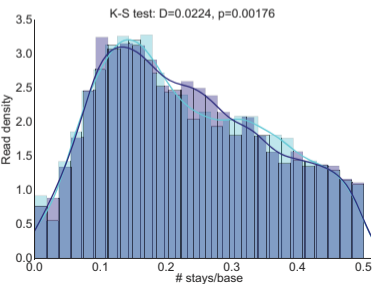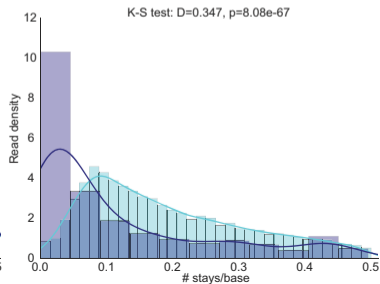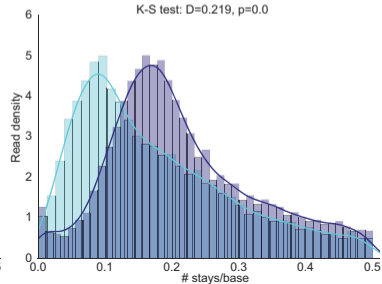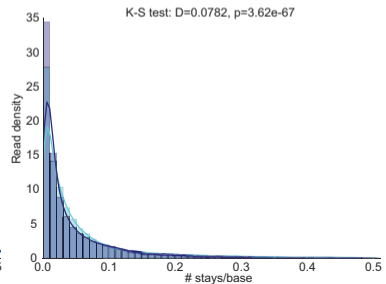

**Supplementary Figure 3. Alignment and base-calling statistics for ISS and Ground runs 1 –**

**4.** The fraction identity of aligned segments for the reads generated on the ISS and on the ground divided by read type and species match. Legend: the 2D reads are shown for mouse, E. coli, and lambda, followed by the 1D reads of the template strand and the complement.



# Flight

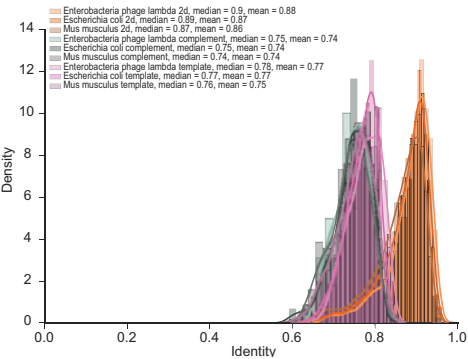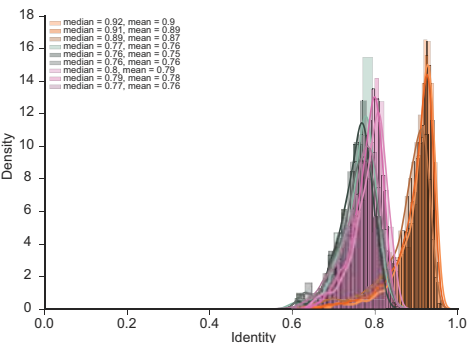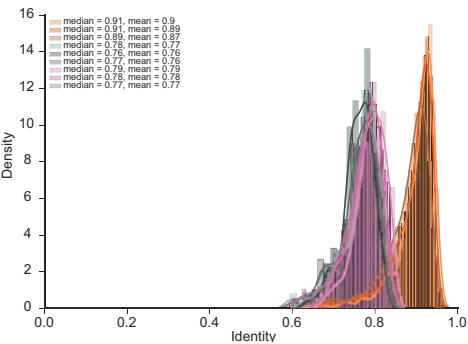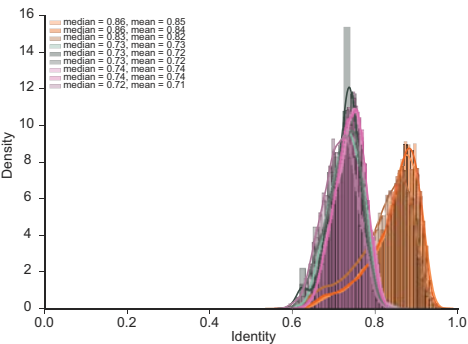

# Ground

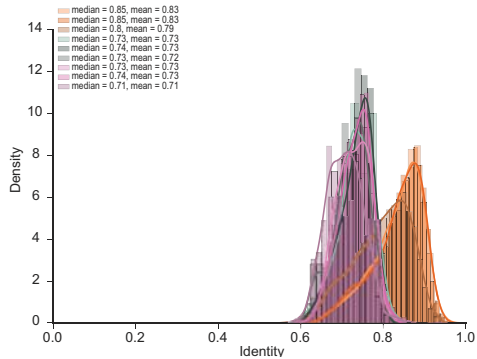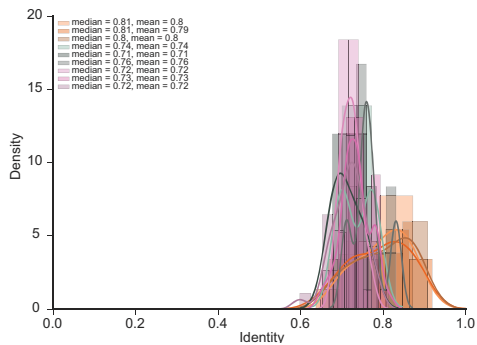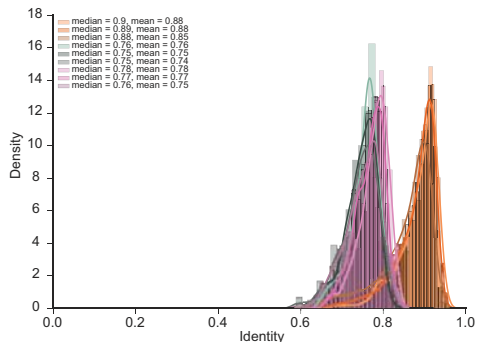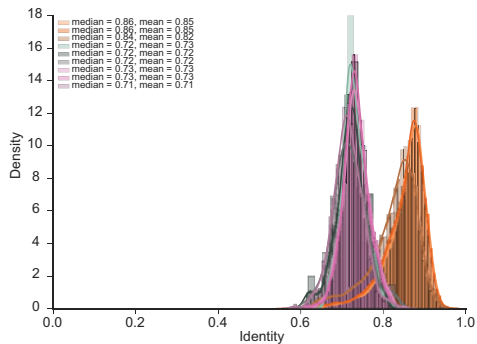

**Supplementary Figure 4. Coverage of the *E. coli* genome from MinION data in runs 1 – 4.**

Coverage for the *E. coli* genome across each run is plotted, sorted by date, showing the coverage (y-axis) across the genome length (x-axis). Alignments were done with the OneCodex platform.

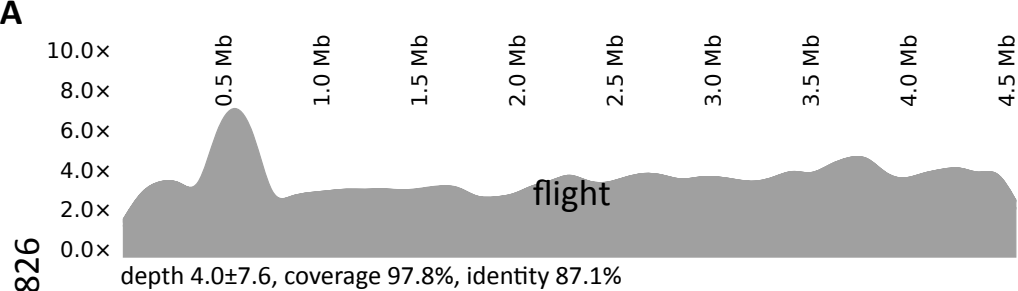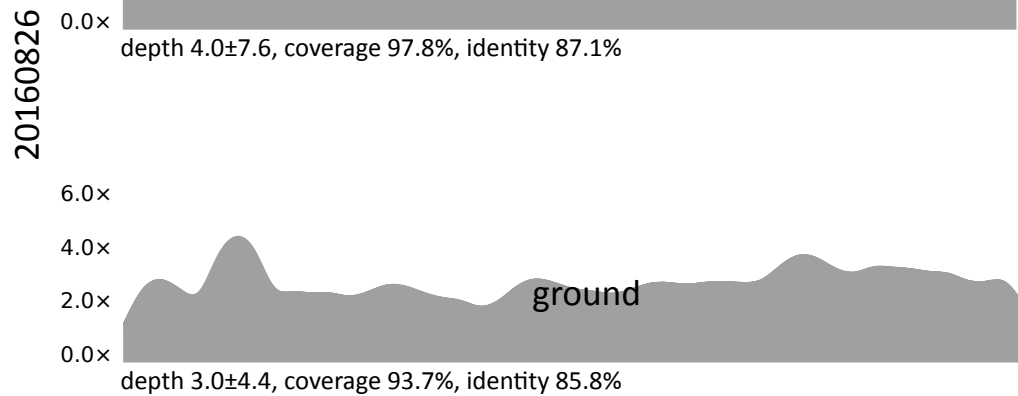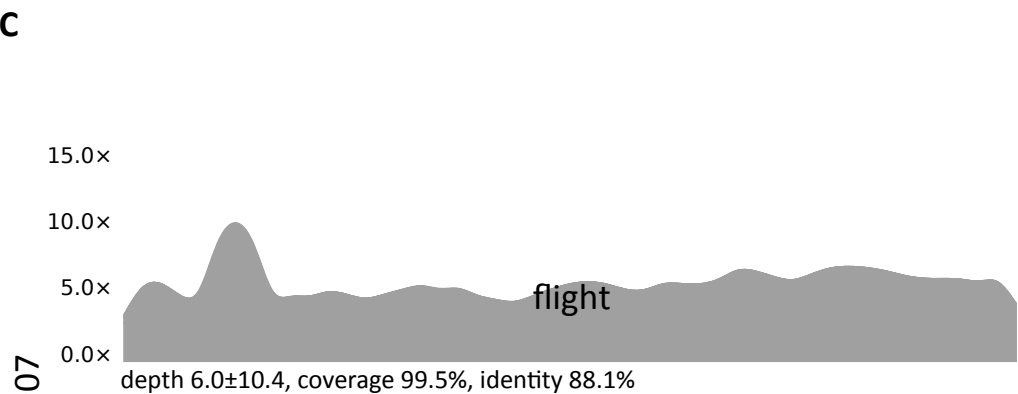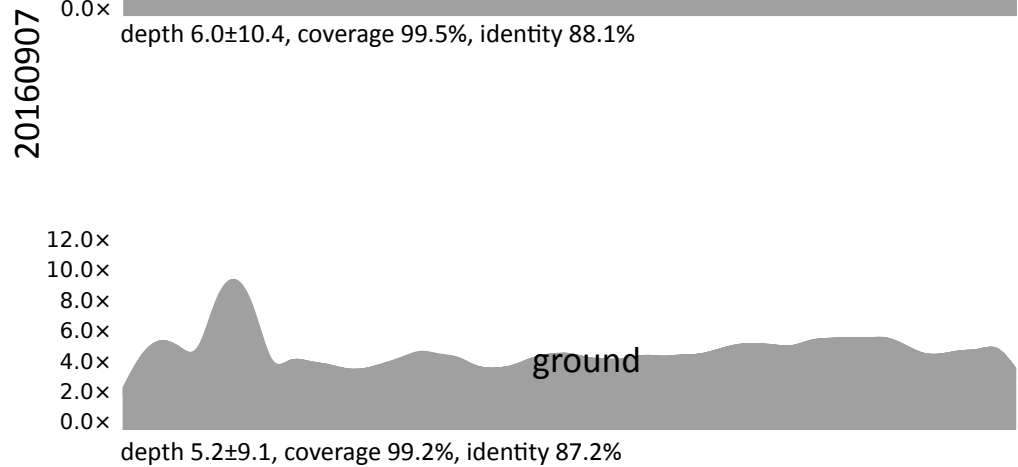

*E. coli*

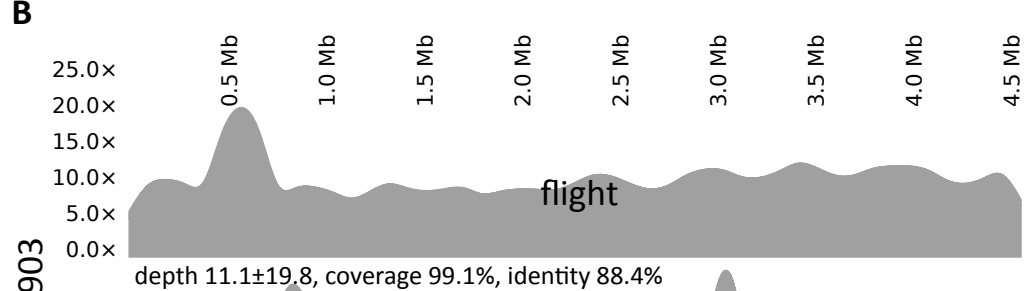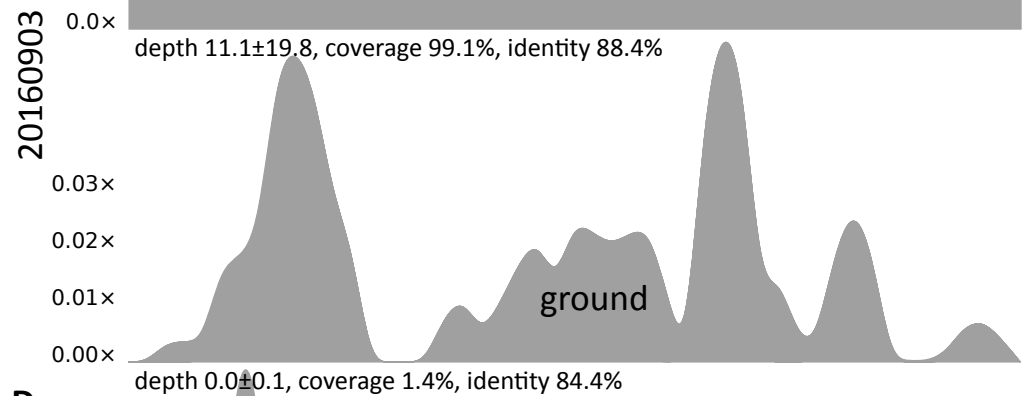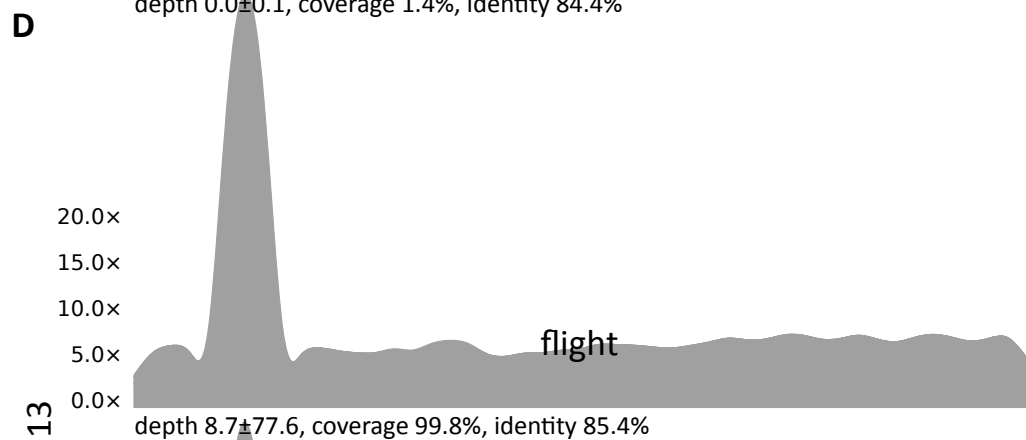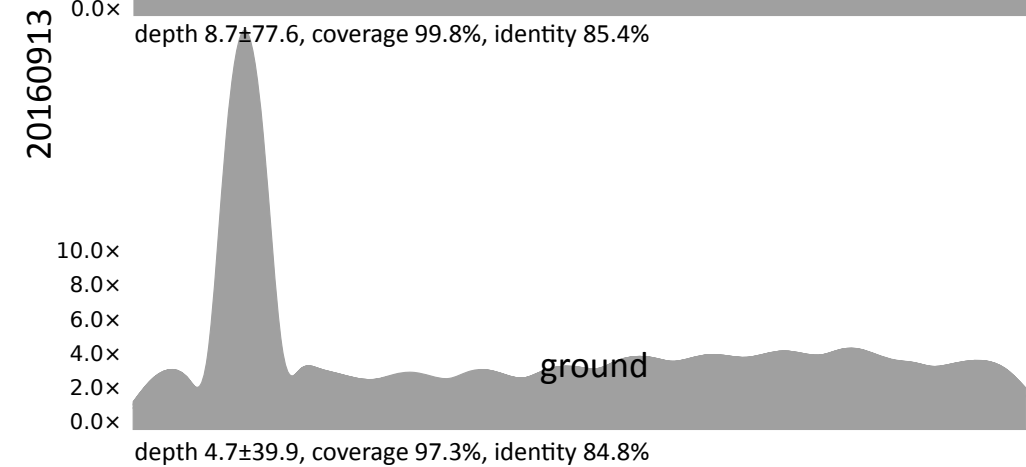

*E. coli*

**Supplementary Figure 5. Read lengths of ISS- and ground-based data.** Read lengths divided by species after GraphMap alignment, for runs 1-4 (top to bottom), on the ISS (left) and on the ground (right). DNA were sheared using Covaris G-Tube standard protocols prior to library preparation, resulting in a distribution of fragment sizes.

### Flight

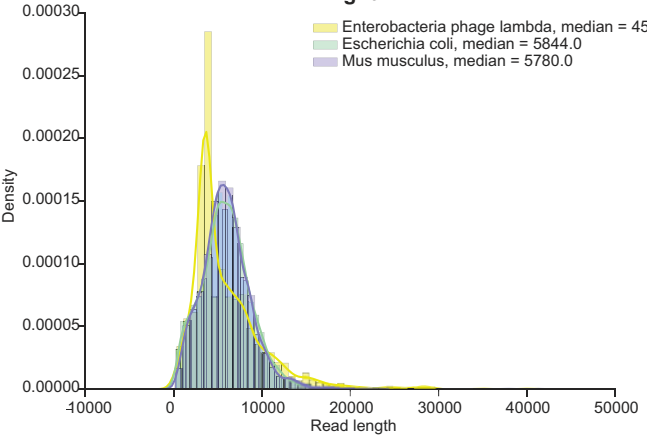

### Ground

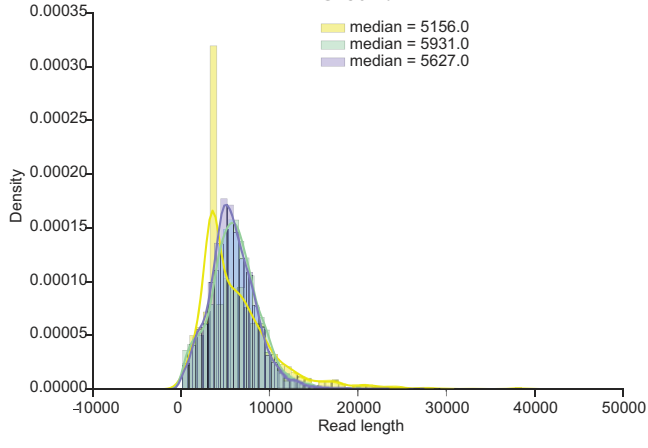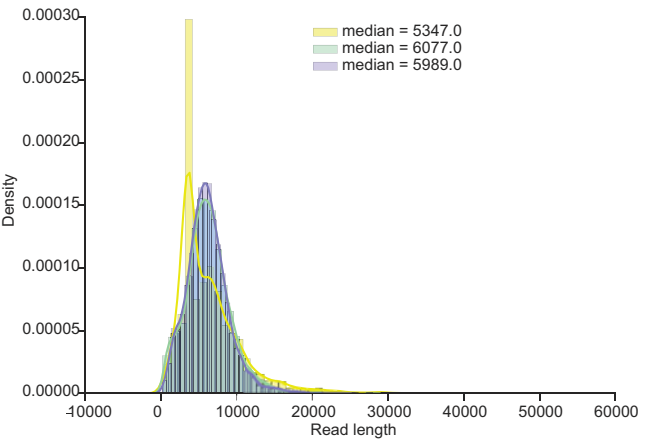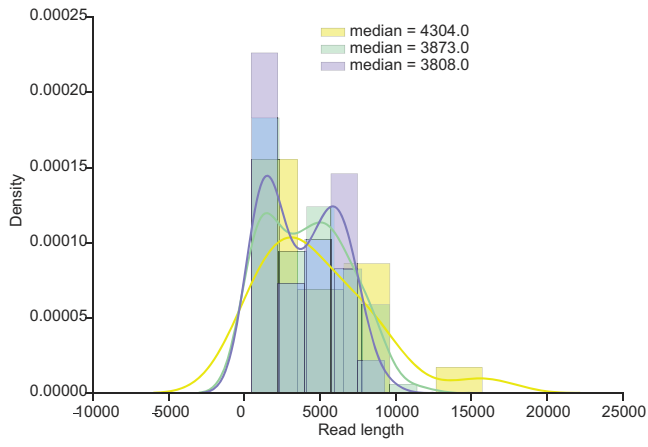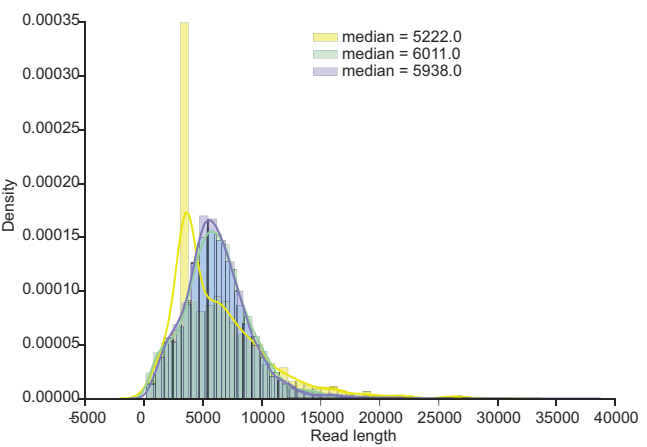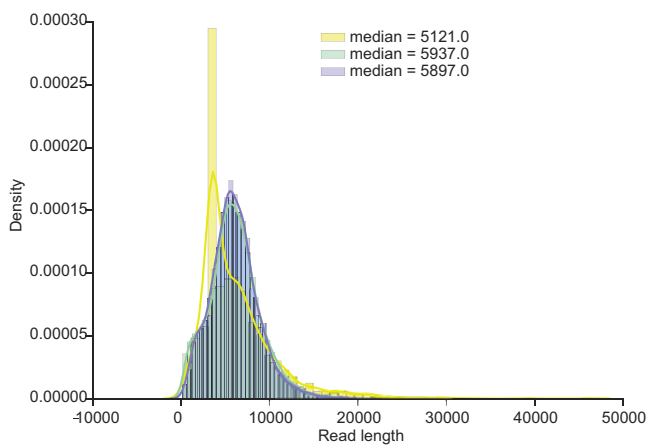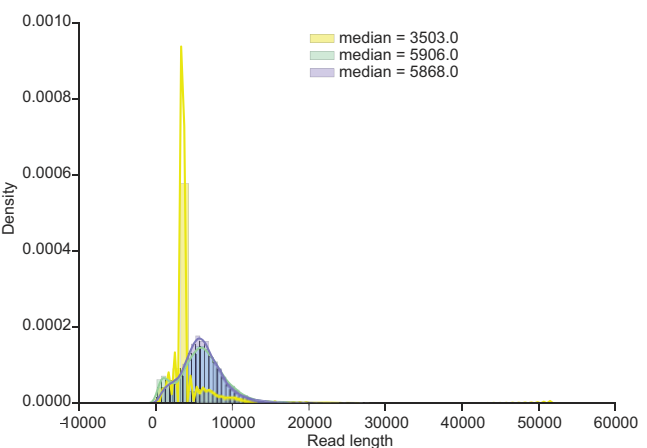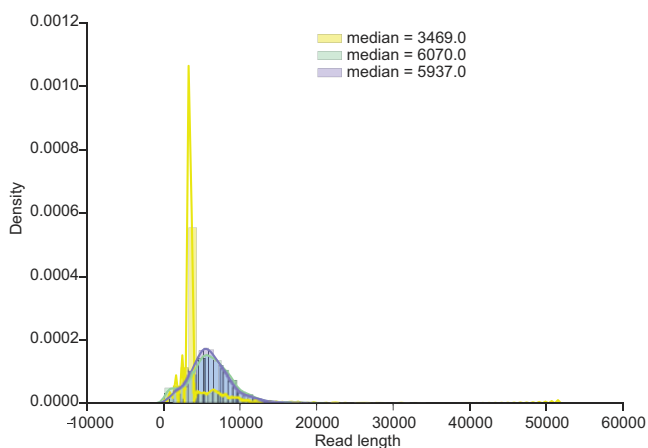

**Supplementary Figure 6. Coverage of the reference *E. coli* genome from the PacBio data.**

We observed an average of 162.7X coverage (y-axis) across the genome, which spanned the entire genome length (x-axis).

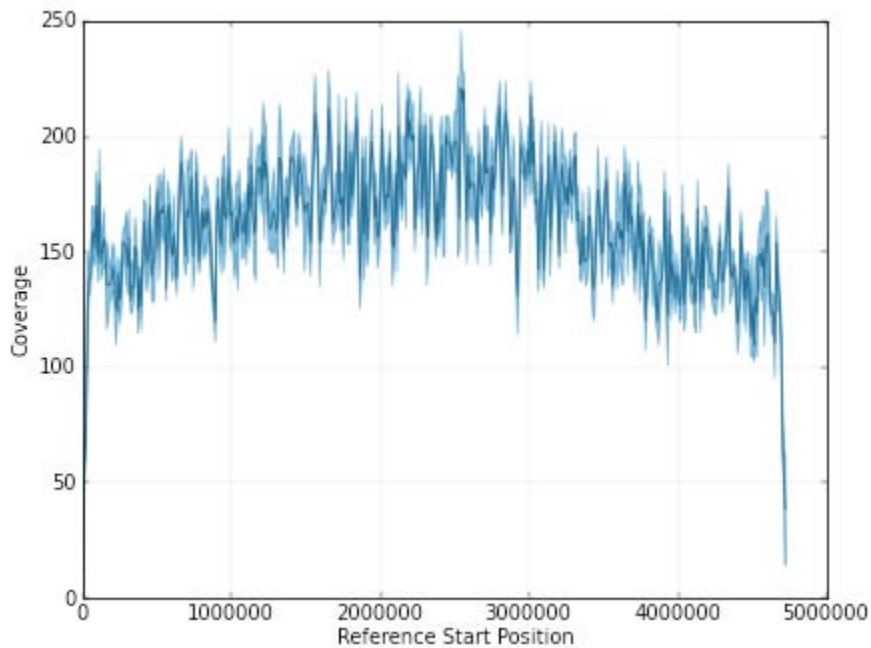

**Supplementary Figure 7: *De novo* genome assembly and cross-platform validation of the ISS nanopore run data.** (A) *De novo* assembly of the *E. coli* genome from PacBio reads generates a single full-length contiguous sequence (contig) of length 4,734,145 base pairs (bp). (B) *De novo* assembly of the *E. coli* genome from ~9 million Illumina reads results in 245 mapped contigs (black segments) that assemble into a low-coverage, 80.1% complete genome (red bars) with 99.7% pairwise identity to the PacBio genome assembly. The orange bars denote regions of the genome with no coverage from an Illumina contig. (C) Direct assembly of the *E. coli* Illumina reads, identified by alignment to *E. coli* K-12, CP014348, to the PacBio genome assembly. As the *E. coli* CP014348 reference does not contain integrated lambda prophage, a narrow gap in coverage is observed corresponding to the lambda phage sequence inserted in the PacBio assembly (“lambda phage”). (D) Direct assembly of lambda Illumina reads to the lambda phage genome (LAMCG).



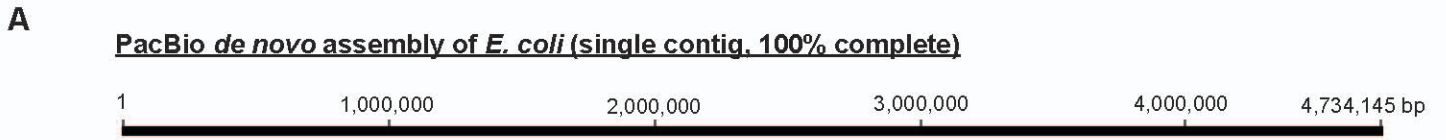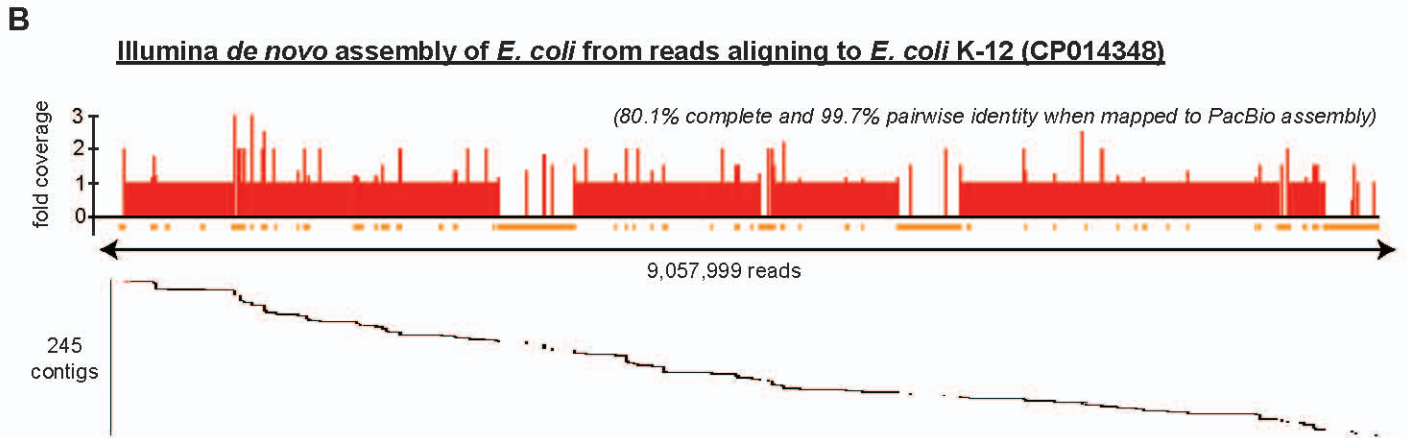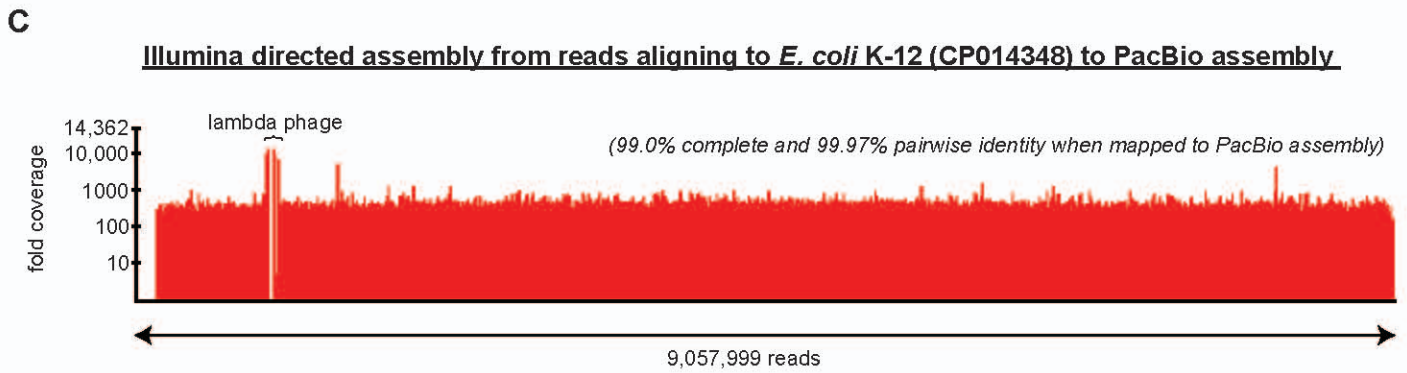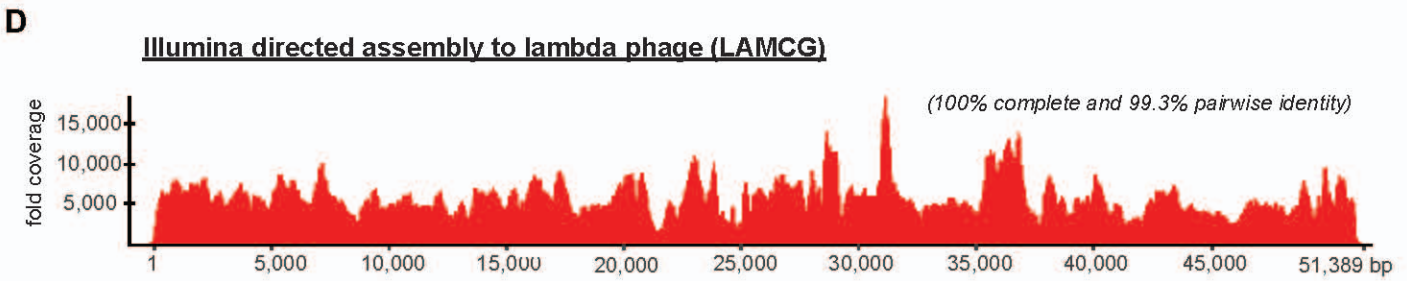

**Supplementary Figure 8. *De novo* assembly of the *E. coli* genomes from in-flight ISS nanopore data, runs 1 – 8.** Shown using Mauve software are alignments of *de novo* assembled contigs to the PacBio genome assembly used as a “gold standard” reference (gray background). **(A)** Contigs are *de novo* assembled using Miniasm from raw 2D reads (top panel), mouse-subtracted reads (middle panel), or *E. coli* reads (bottom panel). **(B)** Contigs are *de novo* assembled using Canu from raw 2D reads (top panel), mouse-subtracted reads (middle panel), or *E. coli* reads (bottom panel). Homologous segments are shown as colored blocks, with blocks that are shifted downward representing segments that are inverted relative to the PacBio genome assembly. Similarly colored lines connecting the blocks are used to indicate mapped positions in the reference genome.

**A*****E. coli* de novo assembly  
(ISS runs #1-8, Miniasm)****raw 2D reads (n=192,042)**

(7 mapped contigs, 85.1% complete, 87.1% identity)

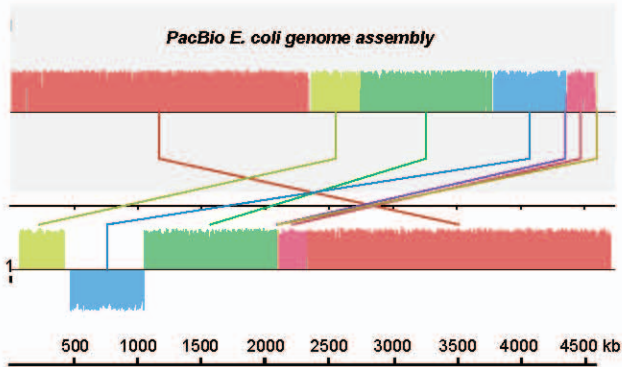**background (mouse)-subtracted 2D reads  
(n=131,048)**

(4 mapped contigs, 87.1% complete, 87.1% pairwise identity)

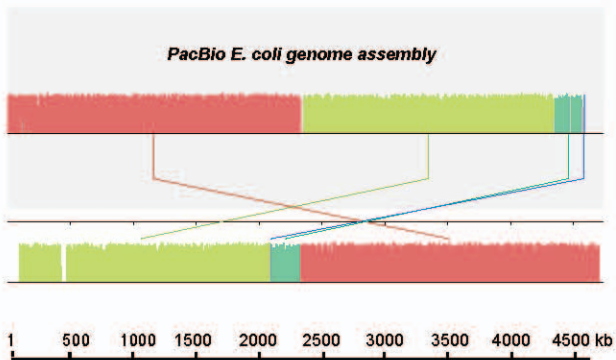***E. coli* 2D reads (n=70,748)**

(3 mapped contigs, 87.6% complete, 87.1% pairwise identity)

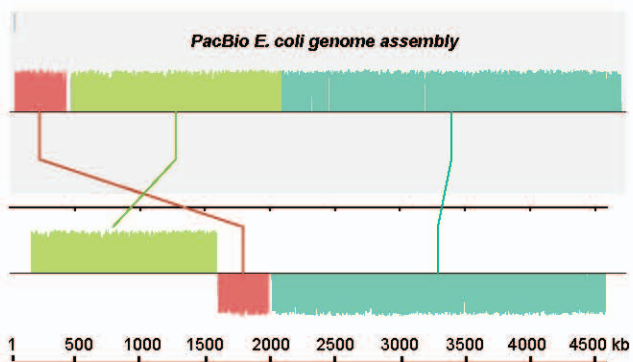**B*****E. coli* de novo assembly  
(ISS runs #1-8, Canu)****raw 2D reads (n=192,042)**

(1 mapped contig, 99.9% complete, 98.6% pairwise identity)

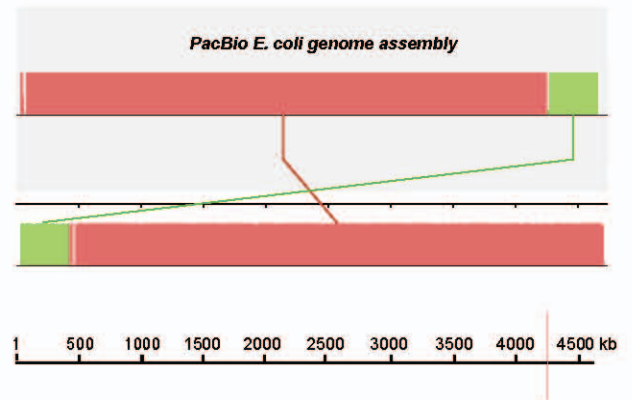**background (mouse)-subtracted 2D reads  
(n=131,048)**

(1 mapped contig, 99.9% complete, 98.6% pairwise identity)

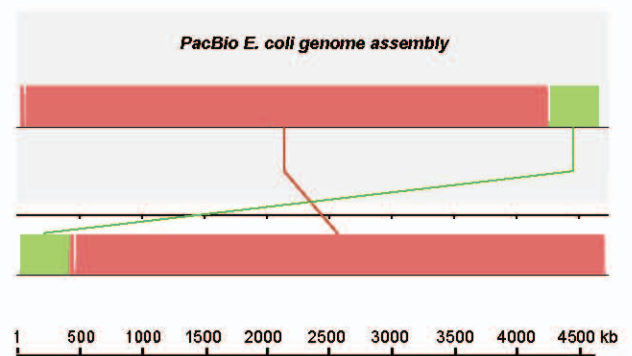***E. coli* 2D reads (n=70,748)**

(1 mapped contig, 99.9% complete, 98.7% pairwise identity)

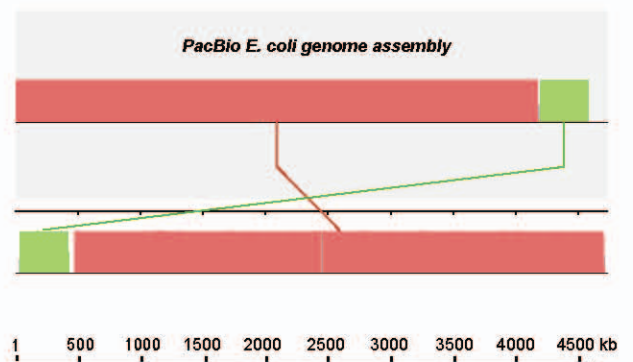

**Supplementary Figure 9. Cloud-based genome assembly.** We used the Amazon Elastic Cloud Computing (EC2) platform to perform a *de novo* “miniasm” assembly of reads obtained from ISS runs 1 – 8, wherein we found that a 32GB RAM, 8-core processor instance could assemble the entire genome for *E. coli* in 15 seconds.

CPU Utilization ( Percent )

Statistic: **Average** ▾

Time Range: **Last Hour** ▾

Period: **5 Minutes** ↻

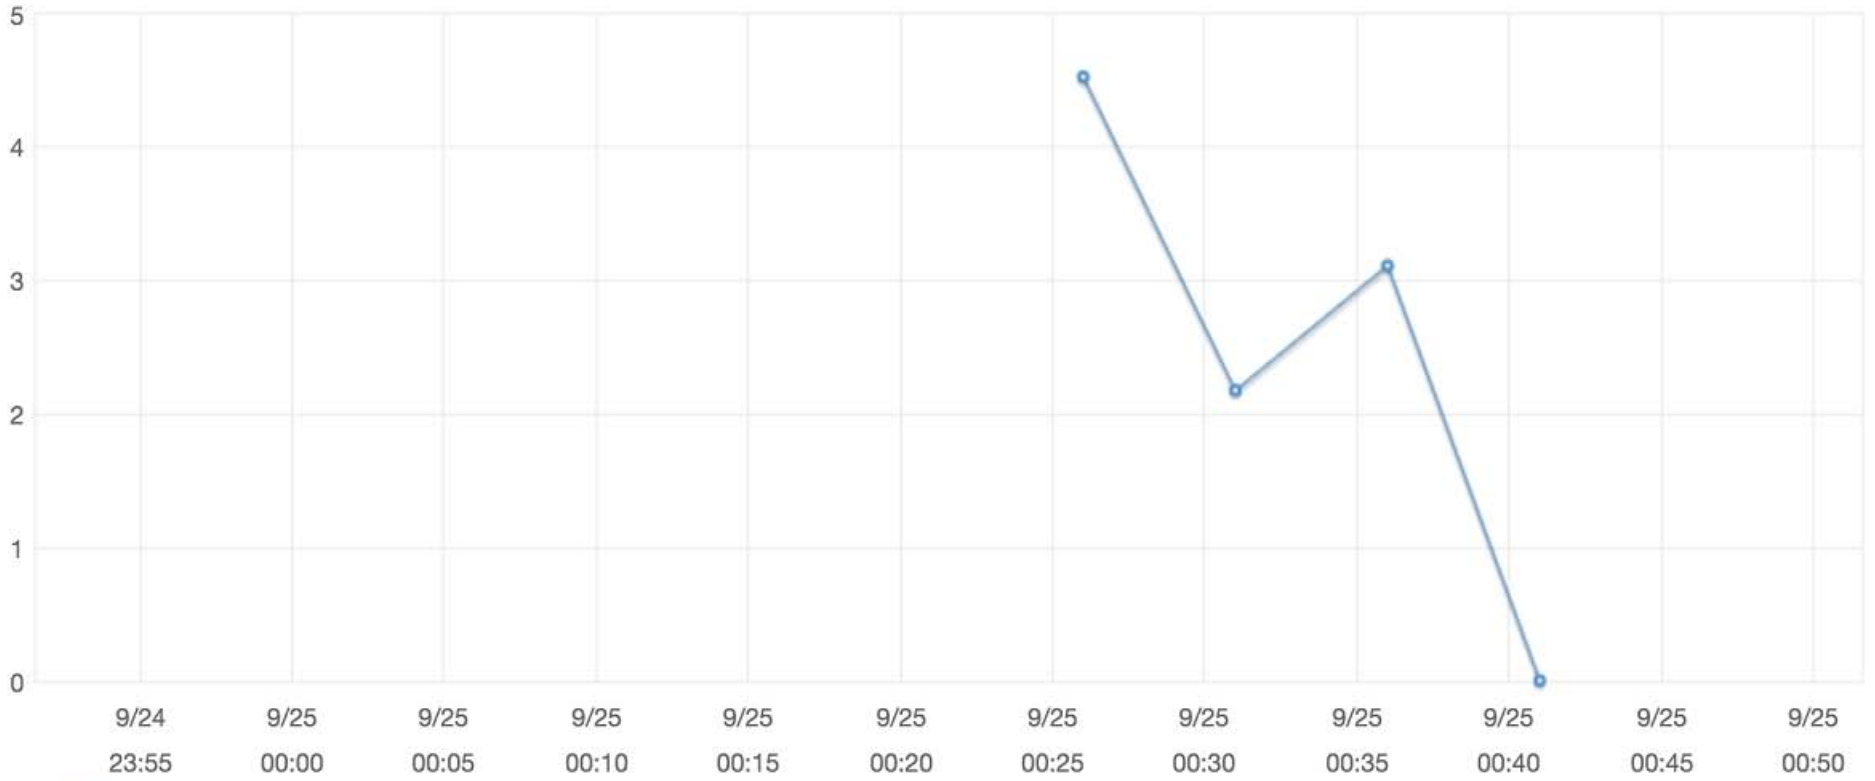

i-9803798e

**Close**

**Supplementary Figure 10. The Biomolecule Sequencer payload.** (A) Surface Pro3 (B) MinION sequencer (C) USB 3.0 cable (D) R7.3 flow cell (E) empty sample syringe for air bubble removal (F) capped DNA containing sample syringe (G) outer transport tube for syringes and sample syringe tip.

A

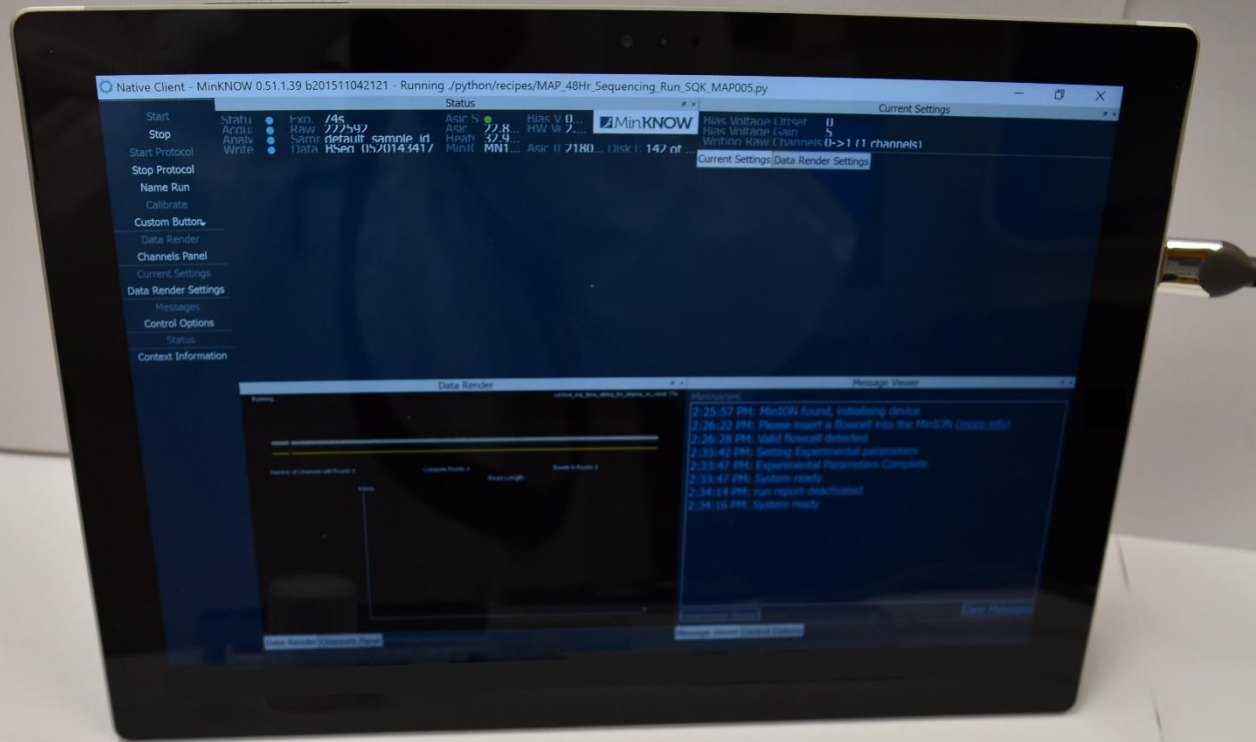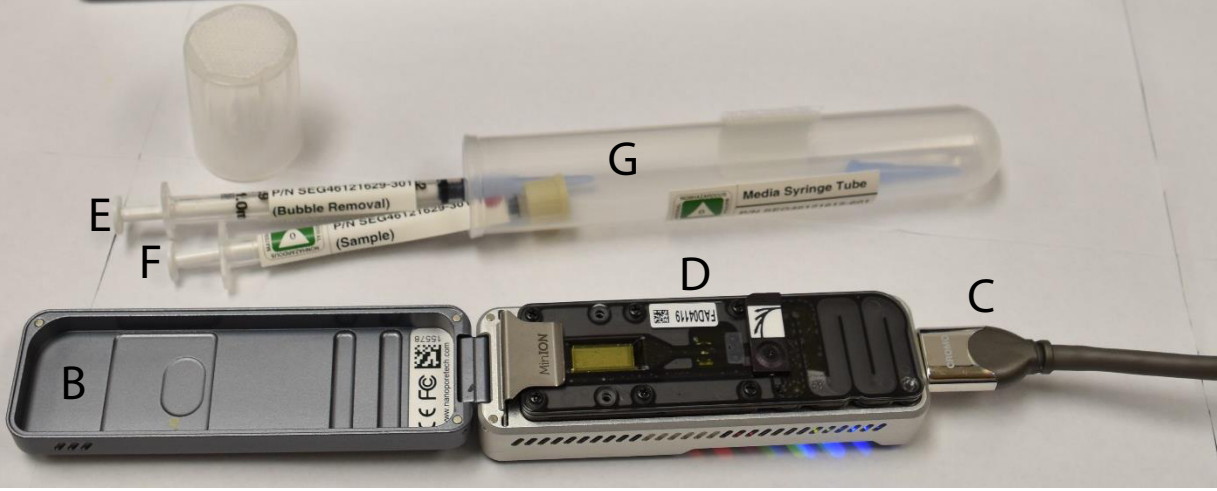

**Supplementary Figure 11.** Computational workflow for the SURPIrt metagenomic analysis pipeline performed on data from ISS runs 1 – 8. Highlighted in red text are the reads identified (“+” branch) or remaining (“-” branch) after each step of the pipeline. Shown in the boxes are the megablast e-value cutoffs used for designating a positive hit (“E-value”) and the number of matched hits (“# matched hits”) considered for taxonomic classification using the lowest common ancestor algorithm.



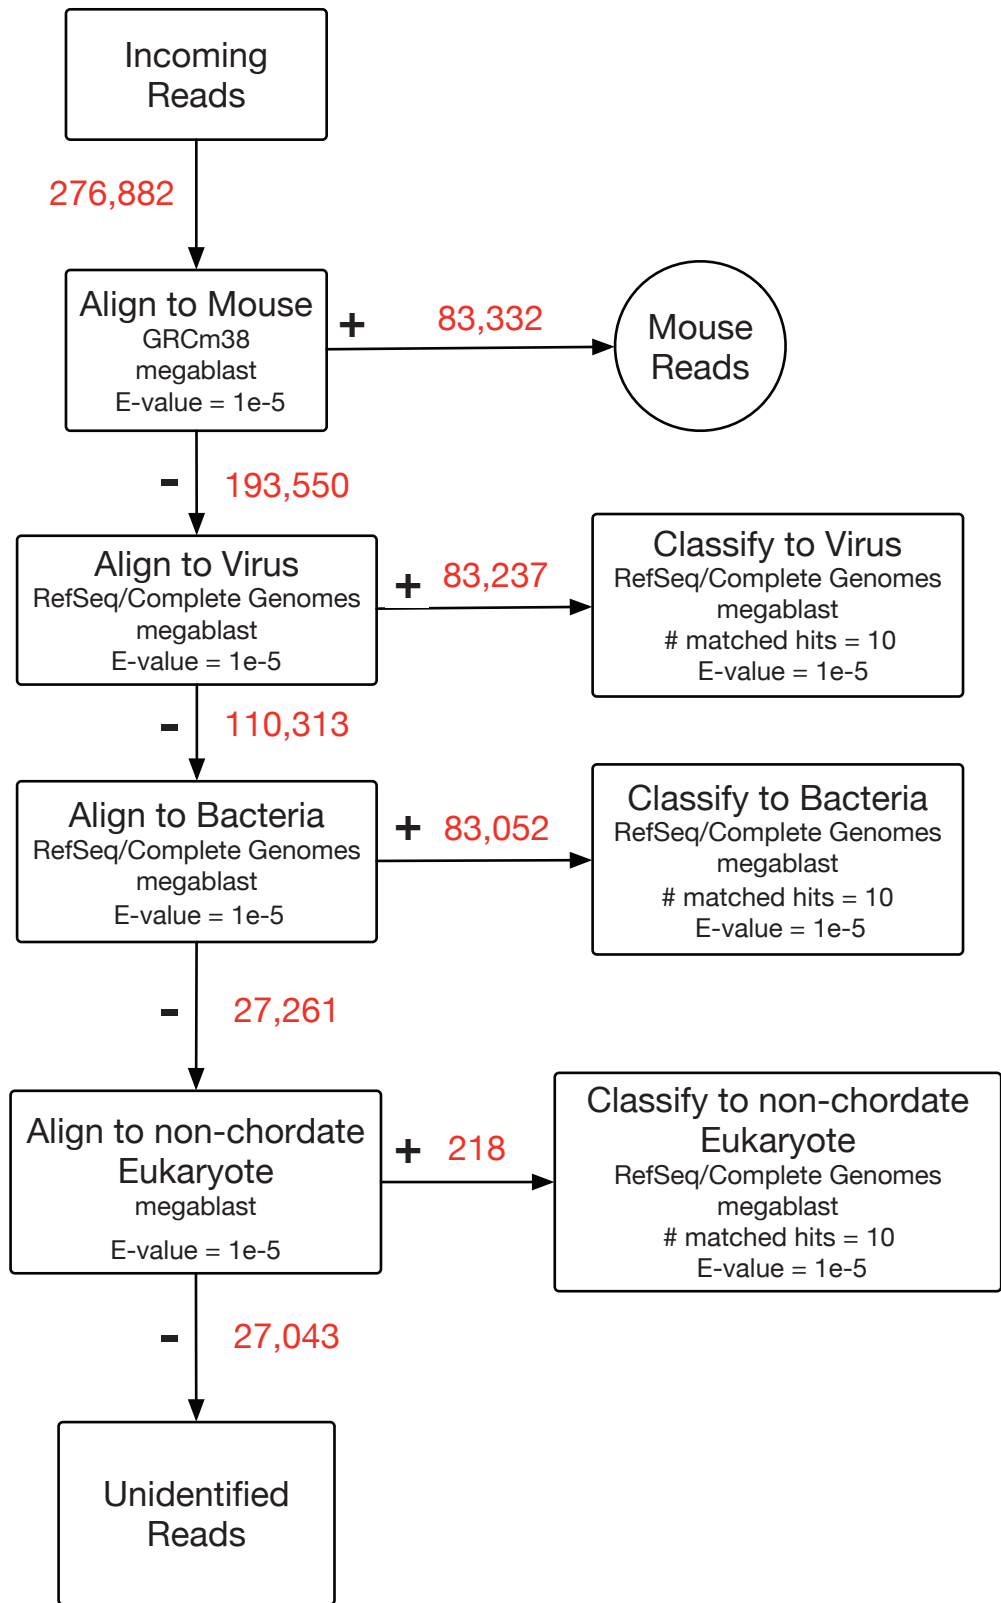

## References

- 1 Li, H. Minimap: Experimental tool to find approximate mapping positions between long sequences. <https://github.com/lh3/minimap/> (2015).
- 2 Altschul, S. F., Gish, W., Miller, W., Myers, E. W. & Lipman, D. J. Basic local alignment search tool. *J Mol Biol* **215**, 403-410, doi:10.1016/S0022-2836(05)80360-2 (1990).
